# Supplementary material for: Tuning the lead complexes based on a double 1,10-phenanthroline derivative with versatile coordination behavior by dicarboxylates: from 0D nano-ring to an unprecedented 0D + 3D cocrystal
Source: Royal Society of Chemistry journal article supplement (doi:10.1039/c2ce26399h), 2012-11-06
Supplement: c2ce26399h.pdf [file c2ce26399h.pdf]

Table S1. Selected bond lengths (Å) and angles (°) for complexes **1–3**.

| <b>1</b>                                                   |            |                 |            |
|------------------------------------------------------------|------------|-----------------|------------|
| Pb1–N1                                                     | 2.668(4)   | Pb1–N2          | 2.639(4)   |
| Pb1–O1                                                     | 2.403(3)   | Pb1–O2          | 2.680(3)   |
| Pb1–O3A                                                    | 2.396(3)   | Pb1–O1W         | 2.976(5)   |
| C39–C40                                                    | 1.215(8)   |                 |            |
| O1–Pb1–O1W                                                 | 94.58(12)  | O1–Pb1–N1       | 76.51(11)  |
| O1–Pb1–O3A                                                 | 84.74(12)  | O2–Pb1–N1       | 115.30(10) |
| O1W–Pb1–N1                                                 | 79.77(12)  | O1W–Pb1–O2      | 71.16(11)  |
| O2–Pb1–O3A                                                 | 77.48(10)  | O2–Pb1–N2       | 125.09(11) |
| N1–Pb1–N2                                                  | 61.38(10)  | O1–Pb1–O2       | 50.95(10)  |
| N1–Pb1–O3A                                                 | 138.19(12) | O1W–Pb1–N2      | 141.14(11) |
| O1–Pb1–N2                                                  | 78.31(11)  | O1W–Pb1–O3A     | 139.47(12) |
| Symmetry code for <b>1</b> : A) $-x - 2, -y + 1, -z + 1$ . |            |                 |            |
| <b>2</b>                                                   |            |                 |            |
| Pb(1)–O(1)                                                 | 2.440(5)   | Pb(1)–N(1)      | 2.721(6)   |
| Pb(1)–O(2)                                                 | 2.492(6)   | Pb(1)–N(2)      | 2.666(6)   |
| Pb(1)–O(3)                                                 | 2.688(7)   | Pb(1)–N(4)      | 2.811(7)   |
| Pb(1)–O(5)                                                 | 3.003(10)  | Pb(1)–N(5)      | 2.826(6)   |
| O(1)–Pb(1)–O(2)                                            | 52.53(19)  | O(1)–Pb(1)–N(4) | 93.09(19)  |
| O(1)–Pb(1)–N(2)                                            | 74.18(18)  | O(2)–Pb(1)–N(4) | 73.10(19)  |
| O(2)–Pb(1)–N(2)                                            | 74.04(19)  | N(2)–Pb(1)–N(4) | 145.76(18) |
| O(1)–Pb(1)–O(3)                                            | 76.6(2)    | O(3)–Pb(1)–N(4) | 133.4(2)   |
| O(2)–Pb(1)–O(3)                                            | 125.8(2)   | N(1)–Pb(1)–N(4) | 98.59(19)  |
| N(2)–Pb(1)–O(3)                                            | 75.39(19)  | O(1)–Pb(1)–N(5) | 77.58(16)  |
| O(1)–Pb(1)–N(1)                                            | 113.95(17) | O(2)–Pb(1)–N(5) | 106.02(19) |
| O(2)–Pb(1)–N(1)                                            | 69.6(2)    | N(2)–Pb(1)–N(5) | 143.45(18) |
| N(2)–Pb(1)–N(1)                                            | 60.64(19)  | O(3)–Pb(1)–N(5) | 75.9(2)    |
| O(3)–Pb(1)–N(1)                                            | 127.4(2)   | N(1)–Pb(1)–N(5) | 154.99(19) |
| N(4)–Pb(1)–N(5)                                            | 57.51(17)  | O(3)–Pb(1)–O(5) | 42.8(3)    |
| O(1)–Pb(1)–O(5)                                            | 114.4(3)   | N(1)–Pb(1)–O(5) | 92.5(3)    |
| O(2)–Pb(1)–O(5)                                            | 143.3(3)   | N(4)–Pb(1)–O(5) | 143.0(3)   |
| N(2)–Pb(1)–O(5)                                            | 69.3(2)    | N(5)–Pb(1)–O(5) | 102.9(2)   |
| <b>3</b>                                                   |            |                 |            |
| Pb(1)–N(1)                                                 | 2.611(6)   | Pb(1)–N(2)      | 2.692(7)   |
| Pb(1)–O(1)                                                 | 2.625(7)   | Pb(1)–O(2)      | 2.551(8)   |
| Pb(1)–O(3)                                                 | 2.553(7)   | Pb(1)–O(4)      | 2.349(7)   |
| Pb(1)–O(8)C                                                | 3.030(94)  |                 |            |
| Pb(2)–N(3)                                                 | 2.654(6)   | Pb(2)–N(4)      | 2.577(6)   |
| Pb(2)–O(5)A                                                | 2.376(8)   | Pb(2)–O(8)      | 2.506(8)   |

|                     |            |                    |            |
|---------------------|------------|--------------------|------------|
| Pb(2)–O(3)D         | 2.8477(70) | Pb(2)–O(6)A        | 2.623(11)  |
| Pb(2)–O(7)          | 2.952(78)  | Pb(2)–O(7)E        | 3.061(76)  |
| Pb(3)–N(7)          | 2.752(6)   | Pb(3)–N(8)         | 2.849(6)   |
| Pb(3)–O(10)         | 2.462(6)   | Pb(3)–O(9)         | 2.568(6)   |
| Pb(3)–O(12)B        | 2.602(6)   | Pb(3)–O(11)B       | 2.412(7)   |
| O(4)–Pb(1)–O(2)     | 82.4(3)    | O(4)–Pb(1)–O(3)    | 53.5(2)    |
| O(2)–Pb(1)–O(3)     | 77.2(2)    | O(4)–Pb(1)–N(1)    | 76.7(2)    |
| O(2)–Pb(1)–N(1)     | 127.1(2)   | O(3)–Pb(1)–N(1)    | 122.40(19) |
| O(4)–Pb(1)–O(1)     | 87.0(3)    | O(2)–Pb(1)–O(1)    | 50.1(2)    |
| O(3)–Pb(1)–O(1)     | 118.8(3)   | N(1)–Pb(1)–O(1)    | 80.4(2)    |
| O(4)–Pb(1)–N(2)     | 74.4(2)    | O(2)–Pb(1)–N(2)    | 153.2(3)   |
| O(3)–Pb(1)–N(2)     | 78.3(2)    | N(1)–Pb(1)–N(2)    | 60.42(19)  |
| O(1)–Pb(1)–N(2)     | 139.3(2)   | O(5)A–Pb(2)–O(8)   | 95.4(4)    |
| O(5)A–Pb(2)–N(4)    | 72.3(3)    | O(8)–Pb(2)–N(4)    | 75.5(2)    |
| O(5)A–Pb(2)–O(6)A   | 50.5(4)    | O(8)–Pb(2)–O(6)A   | 77.9(4)    |
| N(4)–Pb(2)–O(6)A    | 112.9(4)   | O(5)A–Pb(2)–N(3)   | 85.8(3)    |
| O(8)–Pb(2)–N(3)     | 134.6(2)   | N(4)–Pb(2)–N(3)    | 61.7(2)    |
| O(6)A–Pb(2)–N(3)    | 131.1(4)   | O(11)B–Pb(3)–O(10) | 83.0(2)    |
| O(11)B–Pb(3)–O(9)   | 78.3(2)    | O(10)–Pb(3)–O(9)   | 51.9(2)    |
| O(11)B–Pb(3)–O(12)B | 51.2(2)    | O(10)–Pb(3)–O(12)B | 123.2(2)   |
| O(9)–Pb(3)–O(12)B   | 83.6(2)    | O(11)B–Pb(3)–N(7)  | 84.5(2)    |
| O(10)–Pb(3)–N(7)    | 74.03(19)  | O(9)–Pb(3)–N(7)    | 124.55(19) |
| O(12)B–Pb(3)–N(7)   | 123.43(18) |                    |            |

Symmetry code for **3**: A)  $-x - 1, -y + 1, -z + 2$ ; B)  $-x, -y, -z + 2$ ; C)  $-x - 1, -y, -z + 2$ ; D)  $x, y, z - 1$ ; E)  $-x - 1, -y, -z + 1$ .

Table S2. Hydrogen-bonding geometry (Å, °) for complex **1**.

| D–H···A           | D–H···A | D–D···A  | D–H···A |
|-------------------|---------|----------|---------|
| O1W–H1WB···O3w    | 2.07    | 2.856(6) | 154     |
| O2W–H2WA···O4W(A) | 1.92    | 2.764(5) | 171     |
| O2W–H2WB···O4(B)  | 1.91    | 2.761(5) | 176     |
| O3W–H3WA···O2W    | 1.87    | 2.708(5) | 167     |
| O3W–H3WB···O1(C)  | 2.13    | 2.947(5) | 160     |
| O4W–H4WB···O1(C)  | 2.16    | 2.922(5) | 150     |

Symmetry operations: A)  $-x + 1, y - 1/2, -z + 1/2$ ; B)  $x + 2, -y + 1/2, z - 1/2$ ; C)  $x + 1, y, z$ ; D)  $x + 2, y, z$ .

### Analysis of Short Ring-Interactions with Cg-Cg Distances

Cg(I) = Plane number I (= ring number in () above)

Alpha = Dihedral Angle between Planes I and J (°)

Beta = Angle Cg(I)-->Cg(J) or Cg(I)-->Me vector and normal to plane I (°)

Gamma = Angle Cg(I)-->Cg(J) vector and normal to plane J (°)

Cg-Cg = Distance between ring Centroids (Å)

CgI\_Perp = Perpendicular distance of Cg(I) on ring J (Å)

CgJ\_Perp = Perpendicular distance of Cg(J) on ring I (Å)

Slippage = Distance between Cg(I) and Perpendicular Projection of Cg(J) on Ring I (Å).

P,Q,R,S = J-Plane Parameters for Carth. Coord. (Xo, Yo, Zo)

#### 1

Cg1 = N1-C1-C2-C3-C4-C12

Cg2 = N2-C10-C9-C8-C7-C11

Cg3 = N3-C17-C16-C15-C14-C18

Cg4 = N4-C19-C23-C22-C21-C20

Cg5 = N5-C6-C5-N6-C13-C24

Cg6 = C4-C5-C6-C7-C11-C12

Cg7 = C13-C14-C18-C19-C23-C24.

| Cg(I)-Cg(J) | Cg-Cg    | Transformed | J-Plane | P,Q,R,S | Alpha  | Beta   | Gamma | CgI_Perp | CgJ_Perp    | Slippage    |
|-------------|----------|-------------|---------|---------|--------|--------|-------|----------|-------------|-------------|
| Cg1-Cg7A    | 3.784(3) | -0.8498     | -0.2835 | 0.4444  | 2.6878 | 1.9(2) | 28.39 | 27.95    | 3.3423(19)  | 3.3287(19)  |
| Cg4-Cg6B    | 3.706(3) | -0.8347     | -0.2938 | 0.4657  | 9.0948 | 1.8(2) | 26.78 | 28.44    | -3.259(2)   | -3.3091(19) |
| Cg5-Cg6A    | 3.647(3) | -0.8347     | -0.2938 | 0.4657  | 2.5081 | 0.6(2) | 22.7  | 22.17    | 3.3774(18)  | 3.3648(19)  |
| Cg5-Cg7B    | 3.595(3) | -0.8498     | -0.2835 | 0.4444  | 9.3934 | 1.0(2) | 24.41 | 23.75    | -3.2902(18) | -3.2733(19) |
| Cg5-Cg5A    | 3.538(3) | -0.8403     | -0.291  | 0.4574  | 2.5923 | 0      | 17.92 | 17.92    | 3.3664(18)  | 3.3666(18)  |
| Cg4-Cg1A    | 3.539(3) | -0.8371     | -0.2747 | 0.473   | 2.6893 | 2.8(2) | 18.06 | 18.86    | 3.349(2)    | 3.3644(19)  |
| Cg3-Cg2A    | 3.537(3) | -0.8241     | -0.324  | 0.4646  | 2.2048 | 5.9(2) | 13.64 | 18.9     | 3.346(2)    | 3.436(2)    |
| Cg6-Cg7A    | 3.527(3) | -0.8498     | -0.2835 | 0.4444  | 2.6878 | 1.6(2) | 18.53 | 16.92    | 3.3744(19)  | 3.3443(19)  |
| Cg4-Cg5B    | 3.428(3) | -0.8403     | -0.291  | 0.4574  | 9.2231 | 1.5(2) | 17.19 | 17.36    | -3.273(2)   | -3.2756(18) |

A:  $-x - 2, -y + 1, -z$ ; B:  $-x - 3, 1 - y, -z$ .

Cg1 = N1-C6-C14-C15-C16-C17

Cg3 = N3-C12-C13-N3a-C12a-C13a

Cg4 = N4-C18-C28-C29-C30-C31

Cg5 = N5-C19-C23-C22-C21-C20

Cg6 = N6-C24-C27-N7-C26-C25

Cg7 = N8-C33-C32-C36-C35-C34

Cg9 = C6-C7-C11-C12-C13-C14

Cg10 = C18-C19-C23-C24-C27-C28

Cg11 = C25-C26-C32-C33-C37-C41

| Cg(I)-Cg(J) | Cg-Cg    | Transformed | J-Plane | P,Q,R,S | Alpha   | Beta | Gamma | CgI_Perp | CgJ_Perp | Slippage |
|-------------|----------|-------------|---------|---------|---------|------|-------|----------|----------|----------|
| Cg1-Cg5A    | 3.606(4) | -0.9664     | 0.2567  | 0.0144  | -1.2544 | 2.27 | 23.62 | 21.37    | 3.359    | 3.304    |
| Cg1-Cg10A   | 3.633(4) | 0.9626      | -0.2585 | 0.081   | -1.2275 | 4.53 | 23.95 | 21.14    | 3.388    | 3.319    |
| Cg3-Cg6B    | 3.715(4) | -0.963      | 0.264   | -0.0542 | -5.4782 | 3.37 | 22.84 | 24.18    | 3.389    | 3.424    |
| Cg3-Cg6A    | 3.716(4) | 0.963       | -0.264  | 0.0542  | -1.3011 | 3.37 | 22.84 | 24.18    | 3.39     | 3.424    |
| Cg4-Cg11D   | 3.723(4) | -0.967      | -0.2494 | -0.052  | -2.8429 | 6.17 | 20.92 | 14.76    | 3.601    | 3.478    |
| Cg5-Cg7D    | 3.772(5) | -0.9649     | -0.2538 | -0.0673 | -2.9467 | 3.03 | 26.57 | 23.63    | 3.455    | 3.374    |
| Cg6-Cg6D    | 3.722(4) | -0.963      | -0.264  | -0.0542 | -2.8603 | 0    | 23.34 | 23.34    | 3.418    | 3.418    |
| Cg6-Cg9C    | 3.576(4) | 0.9611      | 0.276   | 0.0054  | 9.2987  | 2.88 | 14.49 | 16.73    | 3.424    | 3.462    |
| Cg6-Cg10D   | 3.884(4) | -0.9626     | -0.2585 | -0.081  | -3.0426 | 1.56 | 27.48 | 27.41    | 3.448    | 3.446    |
| Cg10-Cg11D  | 3.746(4) | -0.967      | -0.2494 | -0.052  | -2.8429 | 1.76 | 22.1  | 23.53    | 3.434    | 3.471    |

A:  $x - 1/2, -y + 1/2, z - 1/2$ ; B:  $-x + 3/2, y + 1/2, -z + 1/2$ ; C:  $x + 1/2, -y + 1/2, z + 1/2$ ; D:  $-x + 1, -y, -z + 1$ .

Cg2 = N(2)-C(10)-C(9)-C(8)-C(7)-C(11)

Cg4 = N(4)-C(22)-C(21)-C(20)-C(19)-C(23)

Cg5 = N(5)-C(5)-C(6)-N(6)-C(18)-C(17)

Cg7 = C(16)-C(17)-C(18)-C(19)-C(23)-C(24)

Cg8 = N(7)-C(25)-C(26)-C(27)-C(28)-C(36)

Cg9 = N(8)-C(34)-C(33)-C(32)-C(31)-C(35)

Cg10 = N(9)-C(37)-C(38)-C(39)-C(40)-C(48)

Cg13 = C(28)-C(29)-C(30)-C(31)-C(35)-C(36)

Cg14 = C(40)-C(41)-C(42)-C(43)-C(47)-C(48)

Cg12 = N(11)-C(29)-C(30)-N(12)-C(42)-C(41)

| Cg(I)-Cg(J)    | Cg-Cg    | Transformed | J-Plane | P,Q,R,S | Alpha    | Beta   | Gamma | CgI_Perp | CgJ_Perp  | Slippage  |
|----------------|----------|-------------|---------|---------|----------|--------|-------|----------|-----------|-----------|
| Cg(4)-Cg(2)A   | 3.596(5) | 0.2042      | -0.9767 | -0.0666 | -1.226   | 1.9(4) | 19.54 | 21.39    | -3.348(3) | -3.389(3) |
| Cg(5)-Cg(13)B  | 3.500(4) | -0.157      | 0.9823  | 0.1019  | 8.2612   | 3.1(3) | 11.25 | 13.7     | -3.400(3) | 3.433(3)  |
| Cg(8)-Cg(7)C   | 3.545(5) | -0.2555     | 0.9576  | 0.133   | 2.0757   | 6.6(4) | 19.91 | 14.45    | 3.433(3)  | -3.333(3) |
| Cg(13)-Cg(5)C  | 3.501(4) | -0.2014     | 0.9706  | 0.1315  | 2.5861   | 3.1(3) | 13.7  | 11.25    | 3.433(3)  | -3.401(3) |
| Cg(4)-Cg(8)B   | 3.757(5) | -0.1739     | 0.9832  | 0.0562  | 7.7206   | 3.0(4) | 24.54 | 21.63    | -3.493(3) | 3.418(3)  |
| Cg(5)-Cg(12)B  | 3.751(4) | -0.1648     | 0.9803  | 0.1092  | 8.3984   | 2.5(3) | 27.24 | 25       | -3.399(3) | 3.335(3)  |
| Cg(2)-Cg(7)A   | 3.782(5) | 0.2555      | -0.9576 | -0.133  | -2.5784  | 4.9(4) | 24.61 | 28.95    | -3.310(3) | -3.439(3) |
| Cg(14)-Cg(9)D  | 3.503(5) | 0.1408      | -0.9817 | -0.1285 | -10.0299 | 1.3(4) | 16.18 | 16.05    | 3.366(3)  | 3.364(3)  |
| Cg(13)-Cg(14)D | 3.729(4) | 0.1637      | -0.9785 | -0.1258 | -9.7067  | 1.4(3) | 25.32 | 23.99    | 3.407(3)  | 3.370(3)  |
| Cg(10)-Cg(9)D  | 3.627(5) | 0.1408      | -0.9817 | -0.1285 | -10.0299 | 3.5(4) | 22.03 | 25.04    | 3.285(4)  | 3.362(3)  |
| Cg(12)-Cg(12)D | 3.745(4) | 0.1648      | -0.9803 | -0.1092 | -9.435   | 0      | 24.92 | 24.92    | 3.397(3)  | 3.397(3)  |

A:  $-x - 1, -y, -z + 2$ ; B:  $x - 1, y, z$ ; C:  $x + 1, y, z$ ; D:  $-x + 1, -y + 1, -z + 2$ .

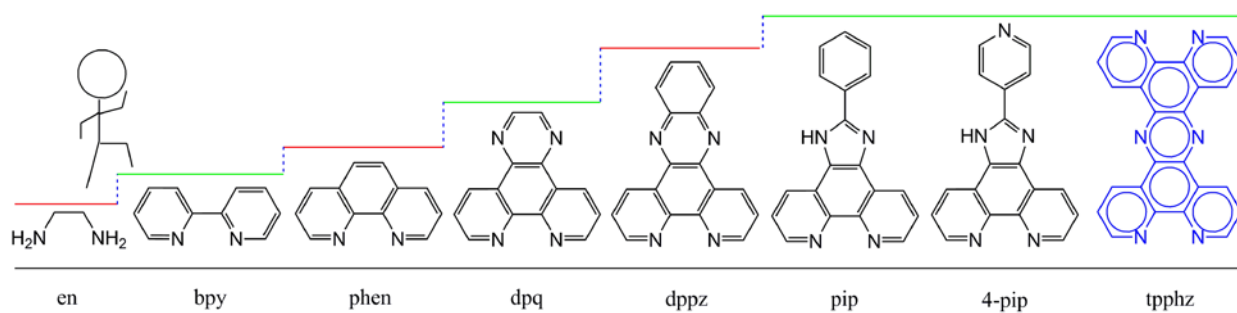

**Chart S1.** The development of chelating ligands.

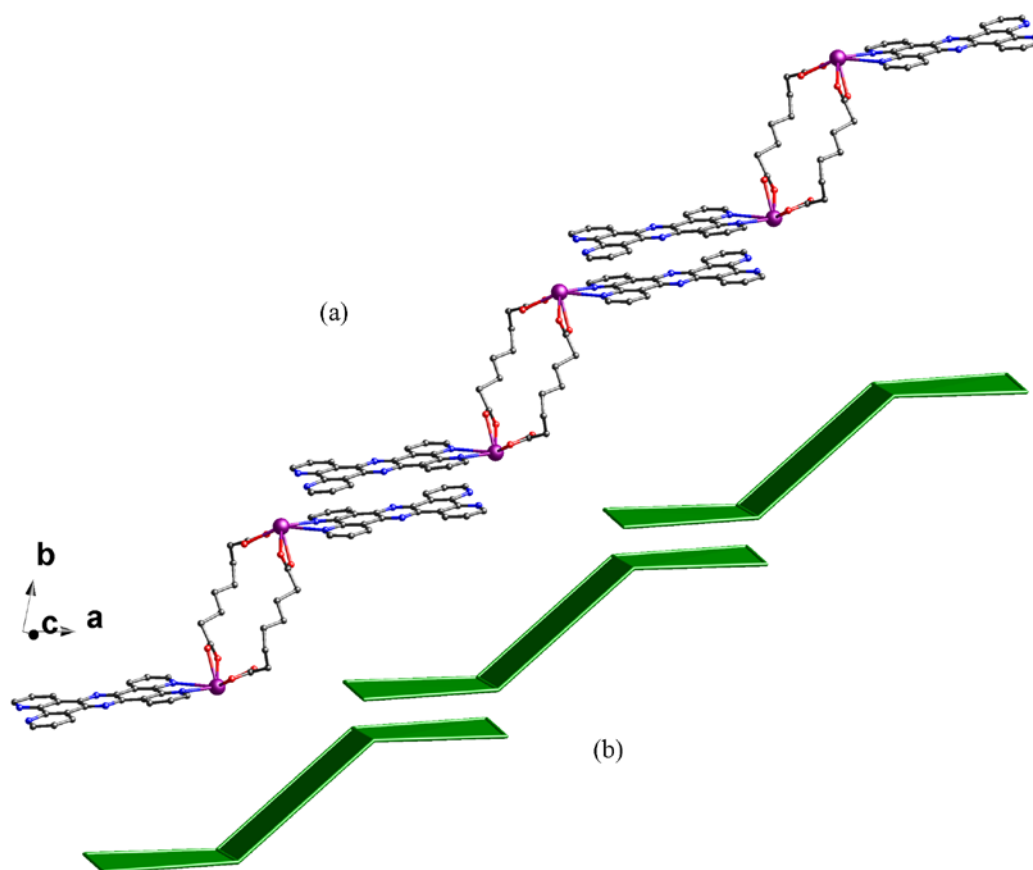

**Figure S1.** 1D staircase-like supramolecular chain derived from nano-scale metal-ring in complex **3**.

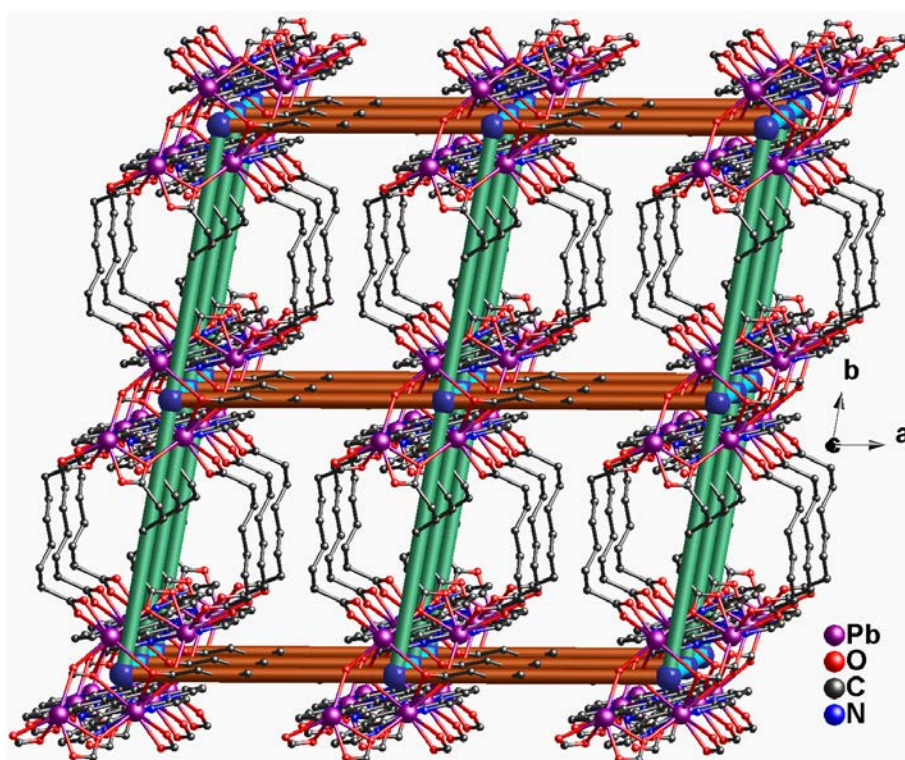

**Figure S2.** 3D open framework with  $\alpha$ -Po type topology network in complex **3**.



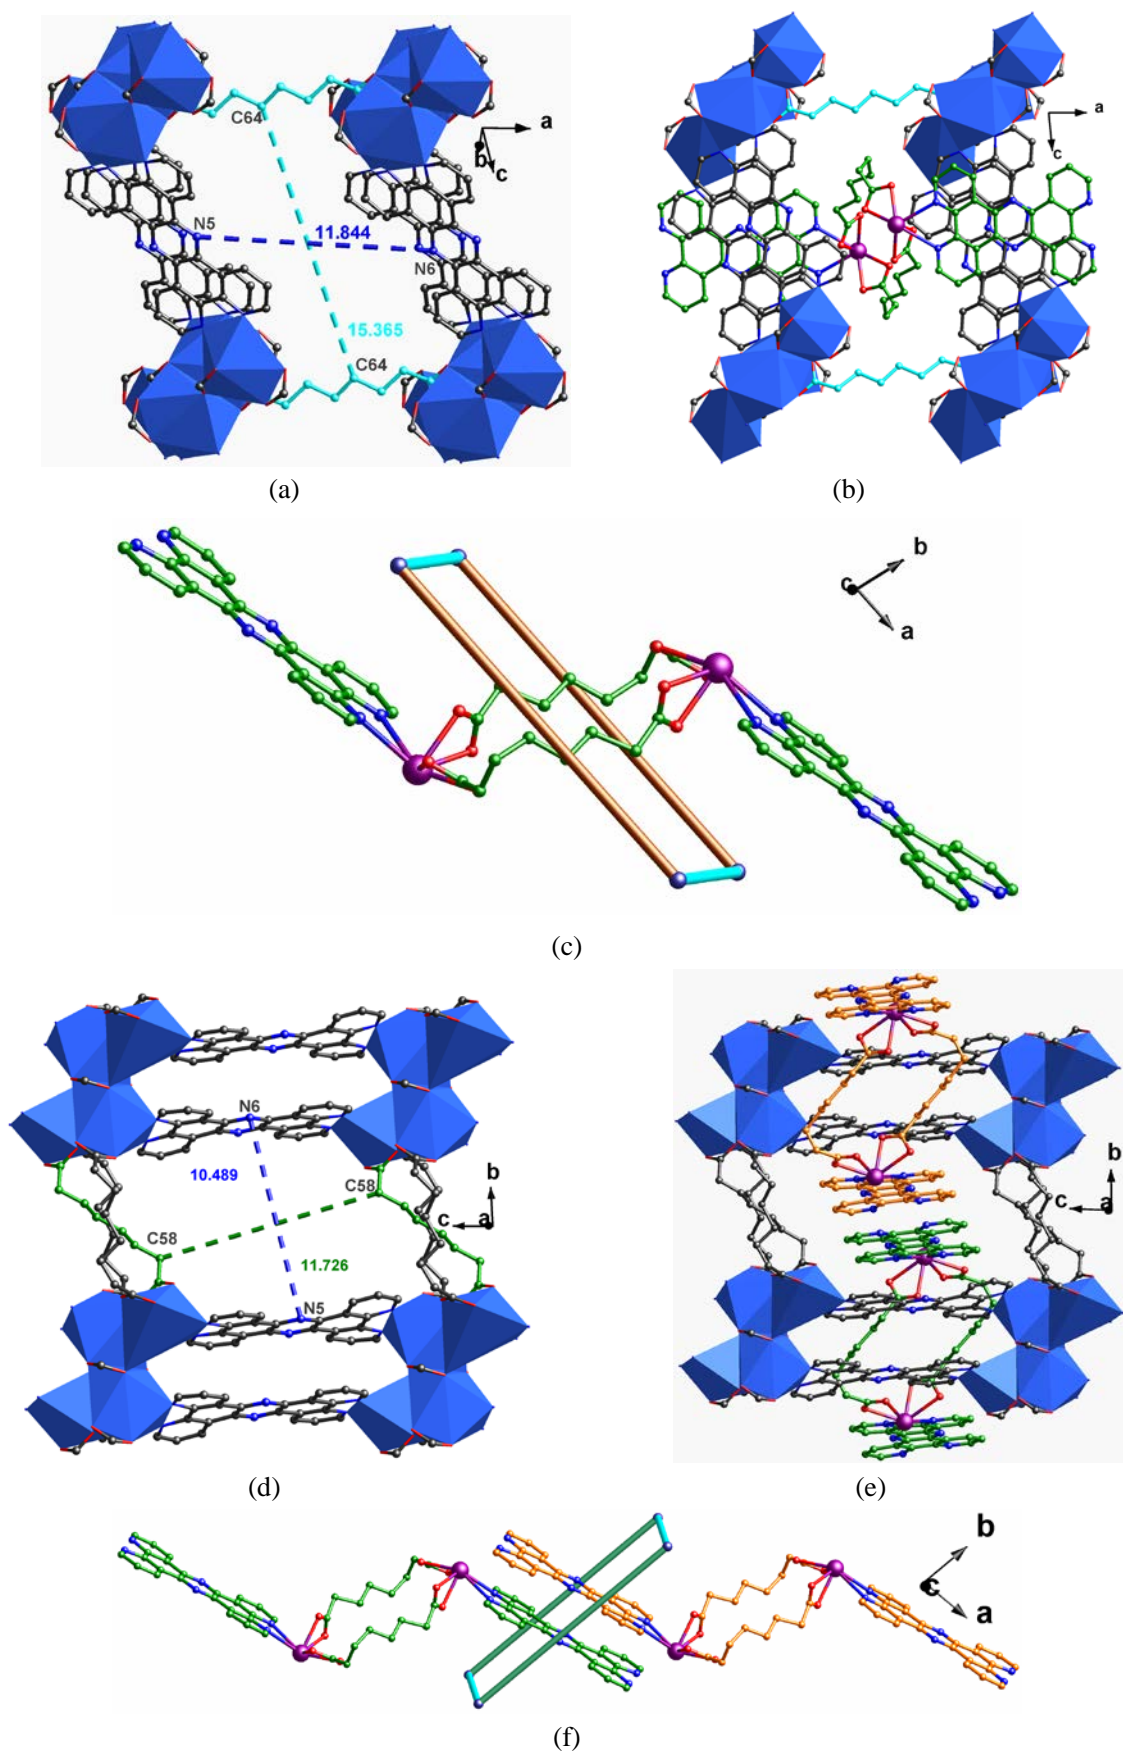

**Figure S3.** Two kinds of 4-members nano-scale rings derived from tpphz and  $L^3$  anions, showing two types of penetrating modes in complex **3**.



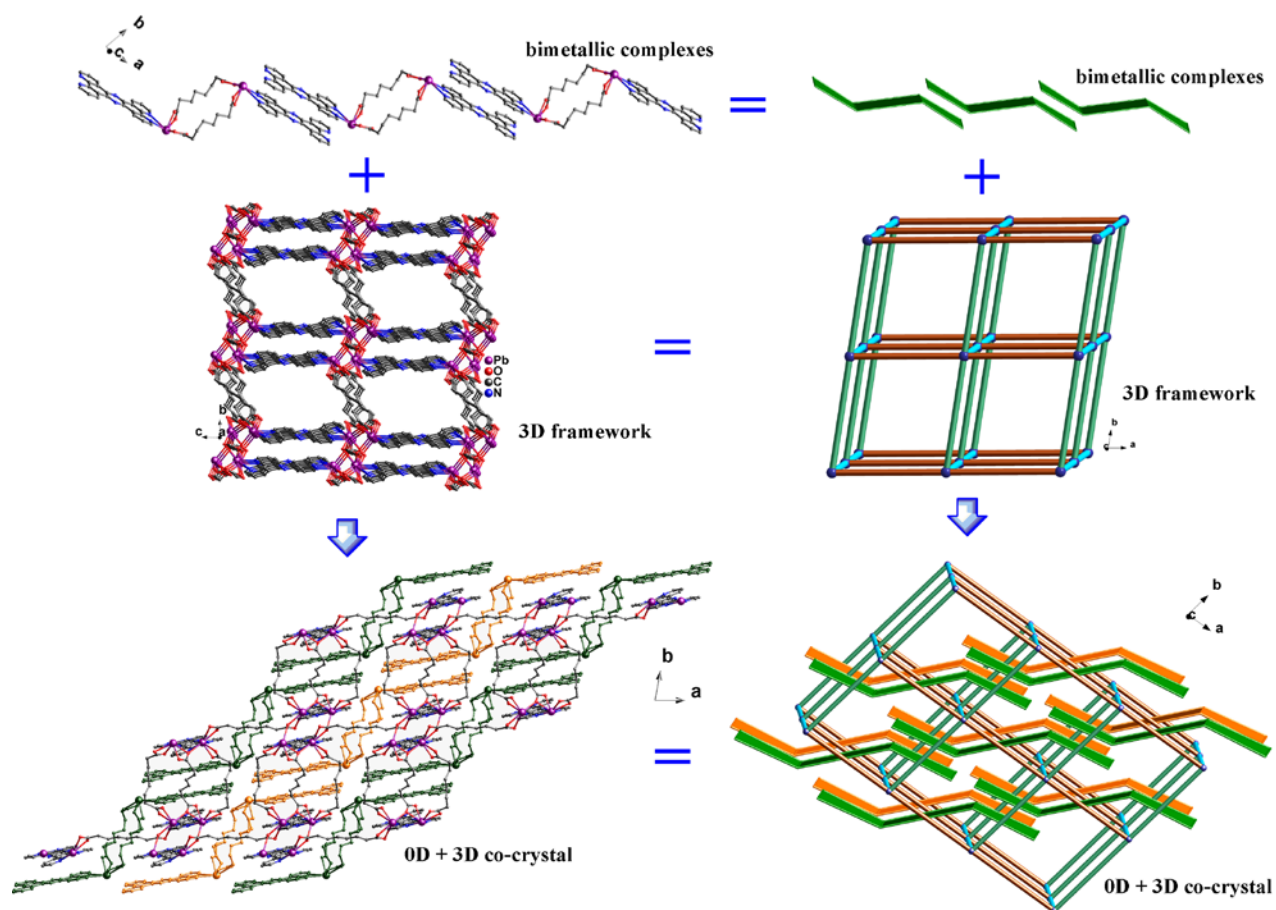

Figure S4. Schematic view of 0D+3D co-crystal of complex 3.

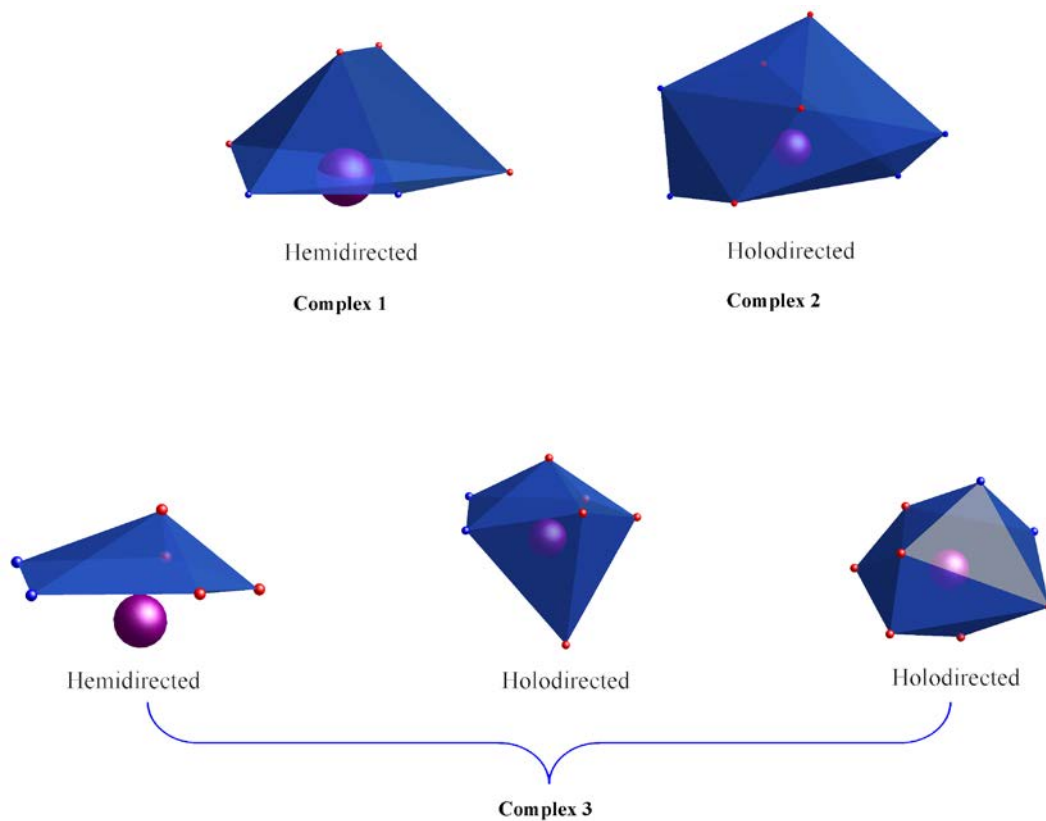

Figure S5. The versatile coordination environments of Pb(II) atoms in complexes 1-3.

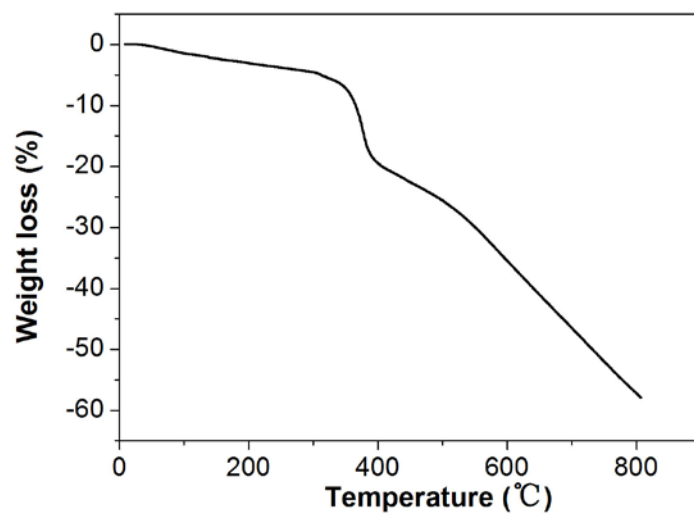

**Figure S6.** The TG curve of complex 3.
